# Supplementary material for: Is poor oral health a risk marker for incident cardiovascular disease hospitalisation and all-cause mortality? Findings from 172 630 participants from the prospective 45 and Up Study
Source: PubMed Central journal article supplement — BMJ Open. 2016 Aug 29;6(8):e012386. doi: 10.1136/bmjopen-2016-012386 (PMC5013478; doi:10.1136/bmjopen-2016-012386), 2016-08-29
Supplement: bmjopen-2016-012386supp.pdf [file bmjopen-2016-012386supp.pdf]

Supplementary Figure 1. Study Flow Diagram

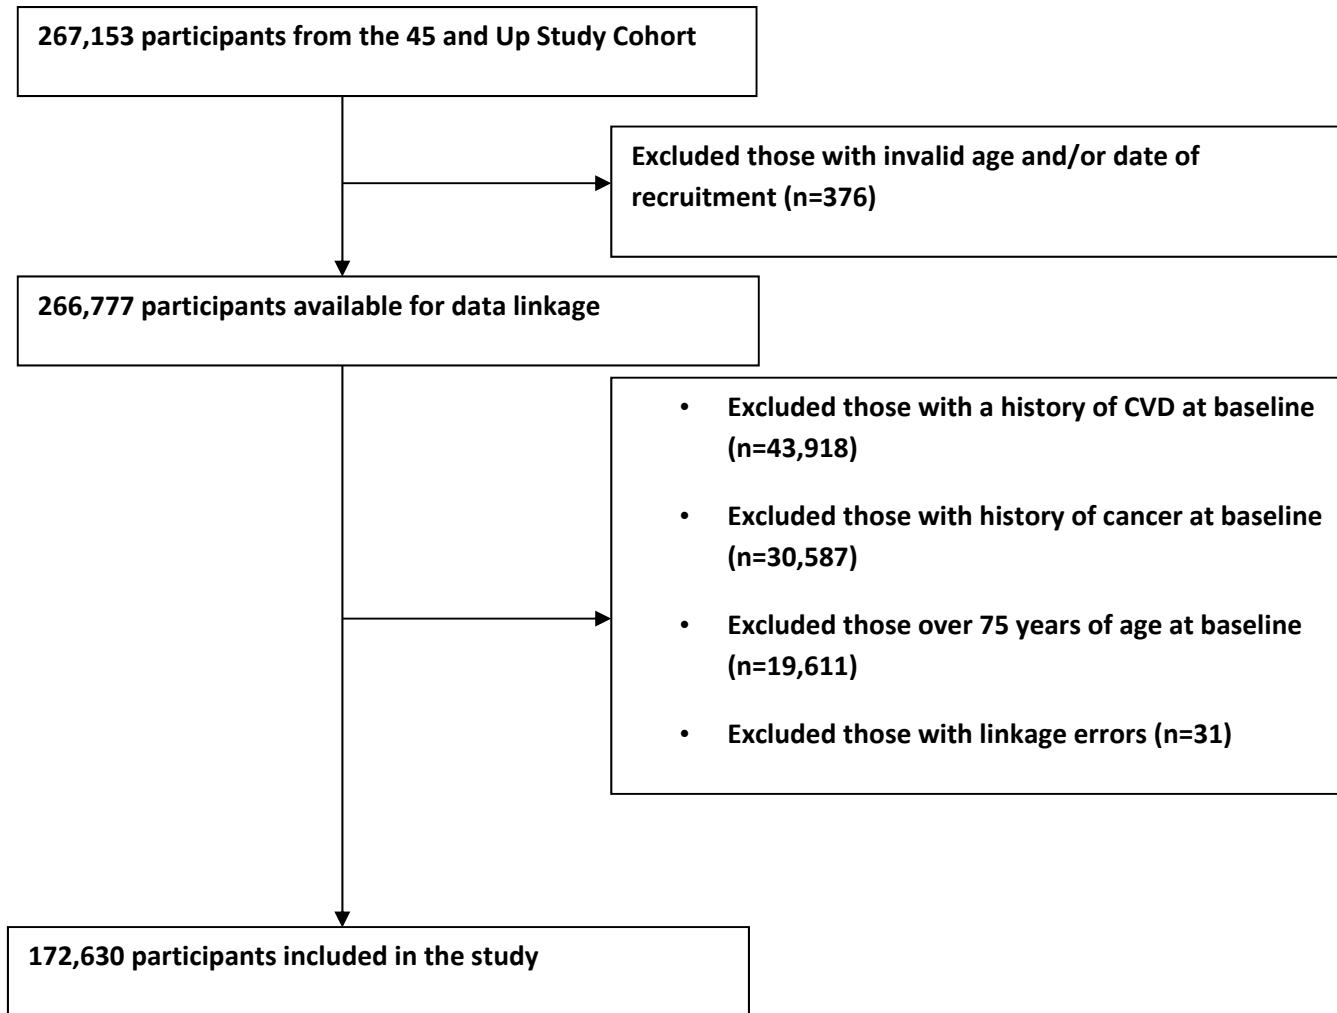

**Supplementary Figure 2. Sensitivity analysis combining response categories of self-rated oral health of “Fair” and “Poor”: Hazard Ratios (95% CI) for incident hospitalisation for CVD and all-cause mortality**

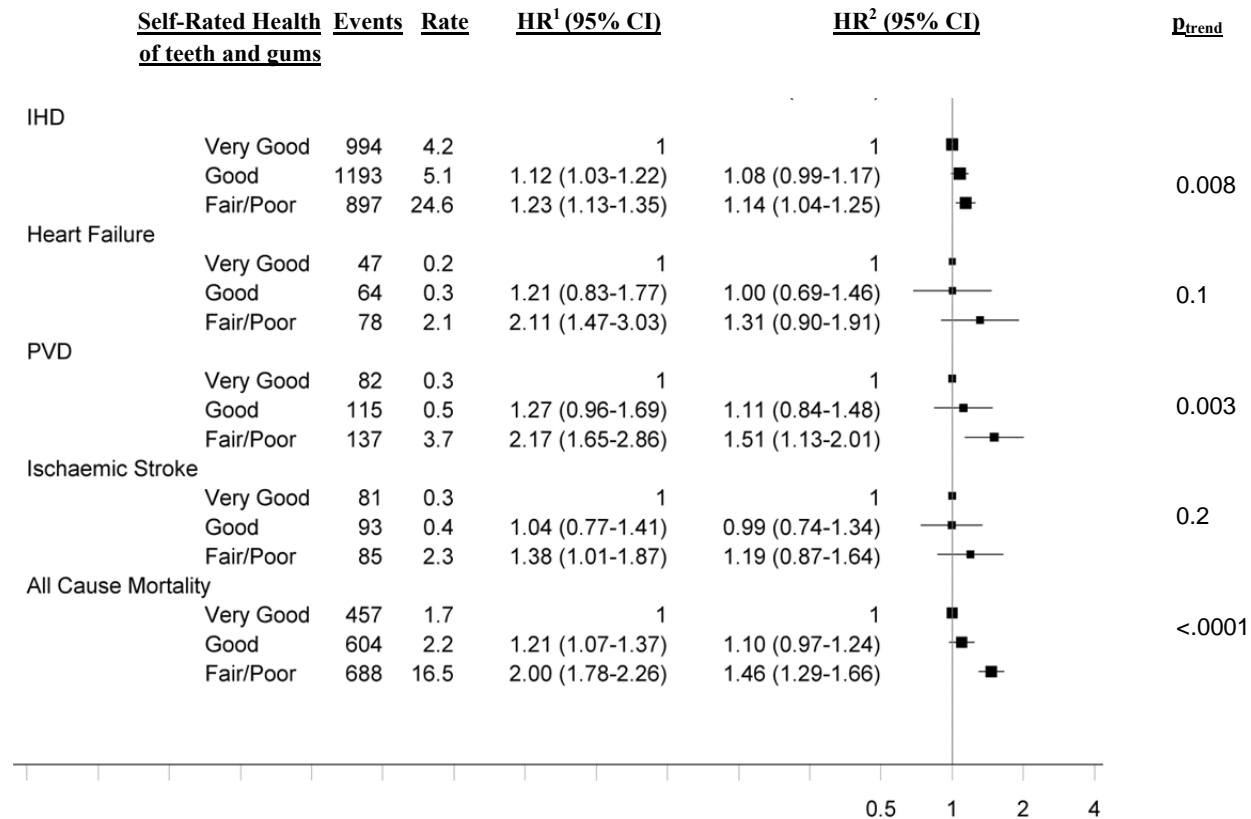

HR: Hazard ratio; Events: Number of events; Rate: Crude rate per 1000 person years; CVD: Cardiovascular disease; IHD: Ischaemic heart disease; PVD: Peripheral vascular disease.

HR<sup>1</sup>: adjusted for age and sex. HR<sup>2</sup>: additionally adjusted for tobacco smoking, alcohol consumption, Australian born status, region of residence, education, private health insurance, physical activity and body mass index.

HR<sup>2</sup> are plotted on a log scale and are represented with squares with areas inversely proportional to the logarithm of events, providing an indication of the magnitude of statistical information available; 95% CIs are indicated by horizontal lines.

**Supplementary Table 1. ICD-10AM codes used to identify major CVD diagnosis in the 6 years prior to entering the study**

| <b>Diagnoses</b>                                                                        | <b>ICD-10AM Diagnosis codes</b> |
|-----------------------------------------------------------------------------------------|---------------------------------|
| selected Hypertensive diseases                                                          | I11-I13                         |
| Ischaemic heart disease                                                                 | I20-I25                         |
| Pulmonary heart disease and diseases of pulmonary circulation                           | I26-I28                         |
| selected other forms of heart disease                                                   | I34-36, I42, I44, I46-I51       |
| selected Cerebrovascular disease                                                        | I61-I67,I69                     |
| selected Diseases of arteries, arterioles and capillaries                               | I70-I77                         |
| selected Diseases of veins, lymphatic vessels and lymph nodes, not elsewhere classified | I80                             |
| selected Episodic and paroxysmal disorders                                              | G45,G46                         |

The aim was to capture major atherosclerotic and arteriovenous thromboembolic and related CVD, from the diagnosis codes for all circulatory diseases (I00-I99, G45, G46). Excluded conditions are those that are primarily affecting the lymphatic system or are caused by other factors, such as: cardiovascular disease caused by infections; non-thrombotic diseases of veins, lymphatic vessels and lymph nodes; and other/unspecified disorders of the circulatory system. Essential hypertension was also excluded on the grounds that it is a risk factor rather than a disease outcome.

**Supplementary Table 2. Australian Classification of Health Interventions codes for CVD related intervention procedures used to identify major CVD diagnosis in the 6 years prior to entering the study**

| <b>Procedures</b>                           | <b>Australian Classification of Health Interventions codes</b>                                                                                                                                                                                                                                                                                                                                                                                                                                                                                                                                                                                                                               |
|---------------------------------------------|----------------------------------------------------------------------------------------------------------------------------------------------------------------------------------------------------------------------------------------------------------------------------------------------------------------------------------------------------------------------------------------------------------------------------------------------------------------------------------------------------------------------------------------------------------------------------------------------------------------------------------------------------------------------------------------------|
| Percutaneous coronary interventions         | 35304-00, 35305-00, 35304-01, 35305-01, 38300-00, 38303-00 (block:670)<br>35310-00, 35310-01, 35310-02, 35310-03, 35310-04, 35310-05, 38306-00, 38306-01, 38306-02, 38306-03, 38306-05 (block: 671)                                                                                                                                                                                                                                                                                                                                                                                                                                                                                          |
| Coronary artery bypass grafting             | 38497-00 to 38497-07, 38500-00 to 38500-04, 38503-00 to 38503-04, 90201-00 to 90201-03, 38500-05, 38503-05 (blocks: 672–679)                                                                                                                                                                                                                                                                                                                                                                                                                                                                                                                                                                 |
| Heart transplant                            | 90205-00, 90205-01 (block: 660)                                                                                                                                                                                                                                                                                                                                                                                                                                                                                                                                                                                                                                                              |
| Cardiac defibrillator implants              | 38524-00, 38521-01, 38521-02, 38521-03, 38393-00 (block:653)                                                                                                                                                                                                                                                                                                                                                                                                                                                                                                                                                                                                                                 |
| Valve replacement, repair or reconstruction | <b>Aortic valve (Blocks 621, 622, 623, 624)</b><br>38456-10, 38483-00, 38270-01, 38480-00, 38481-00, 38488-00, 38488-01, 38489-00, 38489-01, 38456-15, 38653-04, 38475-02, 38477-02.<br><b>Mitral valve (Blocks 625, 626, 627, 628, 629, 630)</b><br>38487-00, 38485-01, 38270-02, 38480-01, 38481-01, 38475-00, 38477-00, 38488-02, 38488-03, 38489-02, 38485-00, 38456-16, 38653-05.<br><b>Tricuspid valve (Blocks 631, 632, 633, 634, 635)</b><br>38456-11, 38480-02, 38481-02, 38475-01, 38477-01, 38488-04, 38488-05, 38489-03, 38456-17, 38653-06.<br><b>Pulmonary valve (Blocks 636, 637, 638)</b><br>38456-01, 38270-03, 38488-06, 38488-07, 38489-04, 38489-05, 38456-18, 38653-07. |
| Pacemaker insertion                         | 38281-00, 38281-01, 38281-02, 38281-03, 38281-04, 38281-05, 38281-06, 38281-07, 38281-08, 38281-09, 38281-10, 38281-11, 38281-12, 38281-13, 38353-00 (blocks: 650, 651, 652)                                                                                                                                                                                                                                                                                                                                                                                                                                                                                                                 |
| Carotid endarterectomy                      | 33500–00 (block: 700)                                                                                                                                                                                                                                                                                                                                                                                                                                                                                                                                                                                                                                                                        |

In the hospitalisation dataset, CVD related diagnostic procedure codes alone do not amount to diagnosis of CVD (unless accompanied by relevant ICD diagnosis codes) and were not used to identify previous CVD. Please see *Joshy G et.al. Public Health Res Pract 2015;25(3):e2531532* for a full justification of this.

**Supplementary Table 3. Distribution of tooth loss by population characteristics**

|                                             |                      | Number of natural teeth left |      |       |      |
|---------------------------------------------|----------------------|------------------------------|------|-------|------|
|                                             |                      | None                         | 1-9  | 10-19 | 20+  |
| Age (years)                                 | 45-64                | 3.3                          | 5.0  | 16.0  | 75.7 |
|                                             | 65-79                | 12.5                         | 13.6 | 25.2  | 48.7 |
| Sex                                         | Female               | 5.8                          | 6.9  | 16.2  | 71.1 |
|                                             | Male                 | 4.5                          | 6.7  | 20.2  | 68.7 |
| Region of residence                         | Inner Regional       | 5.8                          | 7.2  | 18.7  | 68.4 |
|                                             | Major Cities         | 4.0                          | 6.0  | 16.5  | 73.6 |
|                                             | More remote          | 7.0                          | 7.9  | 19.6  | 65.5 |
| Education                                   | < Secondary school   | 15.0                         | 17.3 | 26.1  | 41.5 |
|                                             | Secondary school     | 7.5                          | 9.5  | 22.3  | 60.7 |
|                                             | Trade/Apprenticeship | 4.3                          | 5.8  | 17.8  | 72.1 |
|                                             | Certificate/Diploma  | 4.1                          | 5.8  | 18.0  | 72.1 |
|                                             | Tertiary Education   | 1.6                          | 2.4  | 11.4  | 84.5 |
| Annual household income                     | <\$20k               | 12.5                         | 15.8 | 25.6  | 46.2 |
|                                             | \$20K-<40K           | 6.5                          | 8.7  | 21.9  | 62.9 |
|                                             | \$40K-<70K           | 3.0                          | 4.7  | 17.8  | 74.4 |
|                                             | >=\$70K              | 1.5                          | 2.0  | 11.4  | 85.2 |
| Private health insurance                    | Yes                  | 3.4                          | 4.6  | 15.7  | 76.4 |
|                                             | No                   | 9.3                          | 11.6 | 22.6  | 56.5 |
| Tobacco smoking                             | Current smoker       | 9.6                          | 13.3 | 25.8  | 51.3 |
|                                             | Past smoker          | 6.1                          | 7.8  | 19.9  | 66.2 |
|                                             | Never smoker         | 4.1                          | 5.3  | 15.6  | 75.0 |
| Alcoholic drinks/week                       | 0                    | 7.7                          | 9.6  | 19.5  | 63.2 |
|                                             | 1-14                 | 4.0                          | 5.3  | 16.5  | 74.3 |
|                                             | 15 or more           | 4.2                          | 6.1  | 19.4  | 70.4 |
| Physical activity tertile                   | 1 (lowest)           | 5.4                          | 7.3  | 18.7  | 68.6 |
|                                             | 2                    | 5.0                          | 6.5  | 17.2  | 71.3 |
|                                             | 3 (highest)          | 4.8                          | 6.2  | 17.5  | 71.5 |
| Doctor diagnosed diabetes                   | No                   | 4.9                          | 6.4  | 17.4  | 71.2 |
|                                             | Yes                  | 9.6                          | 12.5 | 24.4  | 53.5 |
| Current treatment for hypertension          | No                   | 4.6                          | 6.0  | 17.0  | 72.3 |
|                                             | Yes                  | 7.8                          | 10.1 | 21.5  | 60.6 |
| Current treatment for hypercholesterolaemia | No                   | 4.9                          | 6.5  | 17.5  | 71.1 |
|                                             | Yes                  | 7.6                          | 9.2  | 20.6  | 62.6 |
| Aspirin treated                             | No                   | 4.9                          | 6.5  | 17.5  | 71.0 |
|                                             | Yes                  | 8.8                          | 10.3 | 22.3  | 58.6 |
| Australian Born                             | No                   | 5.2                          | 7.2  | 18.0  | 69.6 |
|                                             | Yes                  | 5.3                          | 6.7  | 17.9  | 70.2 |
| MOS-PF $\geq$ 75                            | No                   | 10.0                         | 13.1 | 24.8  | 52.1 |
|                                             | Yes                  | 4.1                          | 5.3  | 16.4  | 74.2 |

*Data are row percentages.*

**Supplementary Table 4. Distribution of self-rated oral health by population characteristics**

|                                             |                      | Self-rated health of teeth and gums |      |      |           |
|---------------------------------------------|----------------------|-------------------------------------|------|------|-----------|
|                                             |                      | Poor                                | Fair | Good | Very Good |
| Age (years)                                 | 45-64                | 5.6                                 | 17.6 | 37.3 | 39.4      |
|                                             | 65-79                | 7.0                                 | 21.6 | 39.1 | 32.3      |
| Sex                                         | Female               | 5.5                                 | 17.7 | 37.7 | 39.2      |
|                                             | Male                 | 6.5                                 | 19.4 | 37.7 | 36.4      |
| Region of residence                         | Inner Regional       | 5.8                                 | 18.9 | 38.2 | 37.1      |
|                                             | Major Cities         | 5.7                                 | 17.5 | 36.8 | 40.0      |
|                                             | More remote          | 6.7                                 | 19.6 | 38.5 | 35.2      |
| Education                                   | < Secondary school   | 13.9                                | 26.1 | 36.2 | 23.7      |
|                                             | Secondary school     | 6.3                                 | 20.5 | 40.0 | 33.2      |
|                                             | Trade/Apprenticeship | 6.8                                 | 18.8 | 38.1 | 36.4      |
|                                             | Certificate/Diploma  | 5.6                                 | 18.5 | 38.8 | 37.2      |
|                                             | Tertiary Education   | 3.0                                 | 14.0 | 34.9 | 48.2      |
| Annual household income                     | <\$20k               | 14.7                                | 26.7 | 35.6 | 23.1      |
|                                             | \$20K-<40K           | 6.9                                 | 21.8 | 39.7 | 31.5      |
|                                             | \$40K-<70K           | 4.4                                 | 17.9 | 39.7 | 38.1      |
|                                             | >=\$70K              | 2.3                                 | 13.0 | 35.7 | 49.0      |
| Private health insurance                    | Yes                  | 3.0                                 | 15.3 | 38.4 | 43.3      |
|                                             | No                   | 12.1                                | 25.3 | 36.1 | 26.5      |
| Tobacco smoking                             | Current smoker       | 18.0                                | 26.6 | 33.1 | 22.2      |
|                                             | Past smoker          | 6.7                                 | 20.6 | 37.9 | 34.9      |
|                                             | Never smoker         | 3.7                                 | 16.0 | 38.2 | 42.1      |
| Alcoholic drinks/week                       | 0                    | 8.2                                 | 20.9 | 37.5 | 33.4      |
|                                             | 1-14                 | 4.3                                 | 16.8 | 37.9 | 41.0      |
|                                             | 15 or more           | 6.4                                 | 19.3 | 37.3 | 37.0      |
| Physical activity tertile                   | 1 (lowest)           | 7.0                                 | 20.8 | 39.2 | 33.1      |
|                                             | 2                    | 5.1                                 | 17.9 | 38.5 | 38.4      |
|                                             | 3 (highest)          | 5.5                                 | 16.8 | 35.8 | 41.9      |
| Doctor diagnosed diabetes                   | No                   | 5.6                                 | 18.1 | 37.7 | 38.7      |
|                                             | Yes                  | 10.5                                | 23.8 | 37.9 | 27.9      |
| Current treatment for hypertension          | No                   | 5.6                                 | 17.9 | 37.4 | 39.1      |
|                                             | Yes                  | 7.2                                 | 20.7 | 39.0 | 33.2      |
| Current treatment for hypercholesterolaemia | No                   | 5.7                                 | 18.1 | 37.6 | 38.6      |
|                                             | Yes                  | 7.3                                 | 20.8 | 38.5 | 33.4      |
| Aspirin treated                             | No                   | 5.8                                 | 18.3 | 37.6 | 38.3      |
|                                             | Yes                  | 6.8                                 | 20.1 | 38.4 | 34.8      |
| Australian Born                             | No                   | 8.2                                 | 20.6 | 37.3 | 34.0      |
|                                             | Yes                  | 5.2                                 | 17.7 | 37.8 | 39.3      |
| MOS-PF $\geq$ 75                            | No                   | 14.6                                | 27.5 | 36.1 | 21.8      |
|                                             | Yes                  | 4.3                                 | 16.6 | 37.7 | 41.3      |

*Data are row percentages.*

**Supplementary Table 5: Sensitivity analysis combining response categories of number of natural teeth left of “none” and “1-9”: Hazard Ratios (95% CI) for incident hospitalisation for CVD and all-cause mortality**

|                  | Teeth left | HR (95% CI)             | p <sub>trend</sub> |                  | Teeth left | HR (95% CI)             | p <sub>trend</sub> |
|------------------|------------|-------------------------|--------------------|------------------|------------|-------------------------|--------------------|
| IHD              | 20         | 1                       |                    | IHD              | 20         | 1                       |                    |
|                  | 10-19      | 1.05 (0.96-1.15)        | 0.002              |                  | 10-19      | 1.06 (0.96-1.15)        | <b>0.007</b>       |
|                  | 1-9        | <b>1.20 (1.06-1.35)</b> |                    |                  | 0-9        | <b>1.15 (1.04-1.28)</b> |                    |
|                  | None       | 1.10 (0.95-1.26)        |                    |                  |            |                         |                    |
| Heart Failure    | 20         | 1                       |                    | Heart Failure    | 20         | 1                       |                    |
|                  | 10-19      | <b>1.50 (1.04-2.18)</b> | <b>0.0005</b>      |                  | 10-19      | <b>1.51 (1.05-2.19)</b> | <b>0.0002</b>      |
|                  | 1-9        | <b>2.04 (1.35-3.09)</b> |                    |                  | 0-9        | <b>2.01 (1.39-2.90)</b> |                    |
|                  | None       | <b>1.97 (1.27-3.07)</b> |                    |                  |            |                         |                    |
| PVD              | 20         | 1                       |                    | PVD              | 20         | 1                       |                    |
|                  | 10-19      | 1.67 (1.27-2.19)        | <b>&lt;0.0001</b>  |                  | 10-19      | 1.66 (1.26-2.18)        | <b>&lt;0.0001</b>  |
|                  | 1-9        | 1.73 (1.23-2.44)        |                    |                  | 0-9        | 2.06 (1.55-2.74)        |                    |
|                  | None       | 2.53 (1.81-3.52)        |                    |                  |            |                         |                    |
| Ischaemic Stroke | 20         | 1                       |                    | Ischaemic Stroke | 20         | 1                       |                    |
|                  | 10-19      | 1.11 (0.72-1.73)        | 0.8                |                  | 10-19      | 1.20 (0.90-1.61)        | 0.8                |
|                  | 1-9        | 0.90 (0.59-1.40)        |                    |                  | 0-9        | 1.00 (0.70-1.41)        |                    |
|                  | None       | 1.20 (0.90-1.62)        |                    |                  |            |                         |                    |
| Mortality        | 20         | 1                       |                    | Mortality        | 20         | 1                       |                    |
|                  | 10-19      | <b>1.28 (1.14-1.45)</b> | <b>&lt;0.0001</b>  |                  | 10-19      | <b>1.27 (1.13-1.43)</b> | <b>&lt;0.0001</b>  |
|                  | 1-9        | <b>1.71 (1.48-1.97)</b> |                    |                  | 0-9        | <b>1.64 (1.45-1.86)</b> |                    |
|                  | None       | <b>1.65 (1.41-1.92)</b> |                    |                  |            |                         |                    |

HR: adjusted for age and sex, tobacco smoking, alcohol consumption, Australian born status, region of residence, education, health insurance, physical activity and body mass index

**Supplementary Table 6. Hazard Ratio for Incident Hospitalisation for IHD by Number of Natural Teeth Left ( $\geq 10$  vs  $< 10$  teeth left), by finer age categories**

| Age group | Events<br>( $\geq 10$ vs $< 10$ teeth left) | HR <sup>1</sup>  | HR <sup>2</sup>  |
|-----------|---------------------------------------------|------------------|------------------|
| 45-54     | 561/46                                      | 1.09 (1.06-1.13) | 1.10 (1.06-1.13) |
| 55-64     | 1063/225                                    | 1.07 (1.05-1.09) | 1.07 (1.05-1.09) |
| 65-75     | 896/341                                     | 1.05 (1.02-1.07) | 1.05 (1.03-1.07) |

HR: Hazard ratio; Events: Number of events; IHD: Ischaemic heart disease; BMI: body mass index; PA: physical activity. HR<sup>1</sup>: adjusted for age and sex. HR<sup>2</sup>: additionally adjusted for tobacco smoking, alcohol consumption, Australian born status, region of residence, education, private health insurance, physical activity and body mass index, where appropriate.
